# Supplementary material
Source: Royal Society of Chemistry journal article supplement (doi:10.1039/d6gc02427k)
Supplement: d6gc02427k1.pdf [file d6gc02427k1.pdf]

## Supporting Information

### Self-Healable Capacitors with Improved Thermostability from Stereocomplex PLA

Neha Mulchandani<sup>1\*</sup>, Bartosz Mikolaj Gackowski<sup>2</sup>, Luciana Tavares<sup>2</sup>, William Greenbank<sup>2</sup>, Thomas Ebel<sup>2</sup>,  
Anne Ladegaard Skov<sup>1</sup>, Anders Egede Daugaard<sup>1\*</sup>

<sup>1</sup>Danish Polymer Center, Department of Chemical and Biochemical Engineering, Søltofts Plads 227, Technical  
University of Denmark, 2800 Kongens Lyngby, Denmark

<sup>2</sup>Centre for Industrial Electronics, University of Southern Denmark, Alision 2, Sønderborg DK-6400, Denmark

[\\*nehmu@kt.dtu.dk](mailto:*nehmu@kt.dtu.dk), [\\*adt@kt.dtu.dk](mailto:*adt@kt.dtu.dk)

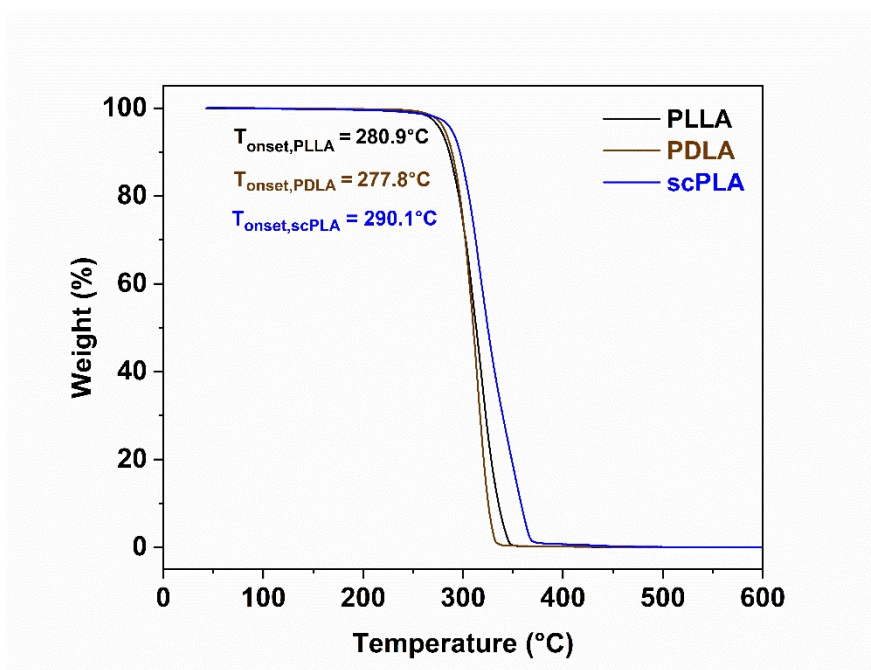

**Figure S1:** Weight loss (%) as a function of temperature for pure PLLA, PDLA and scPLA.

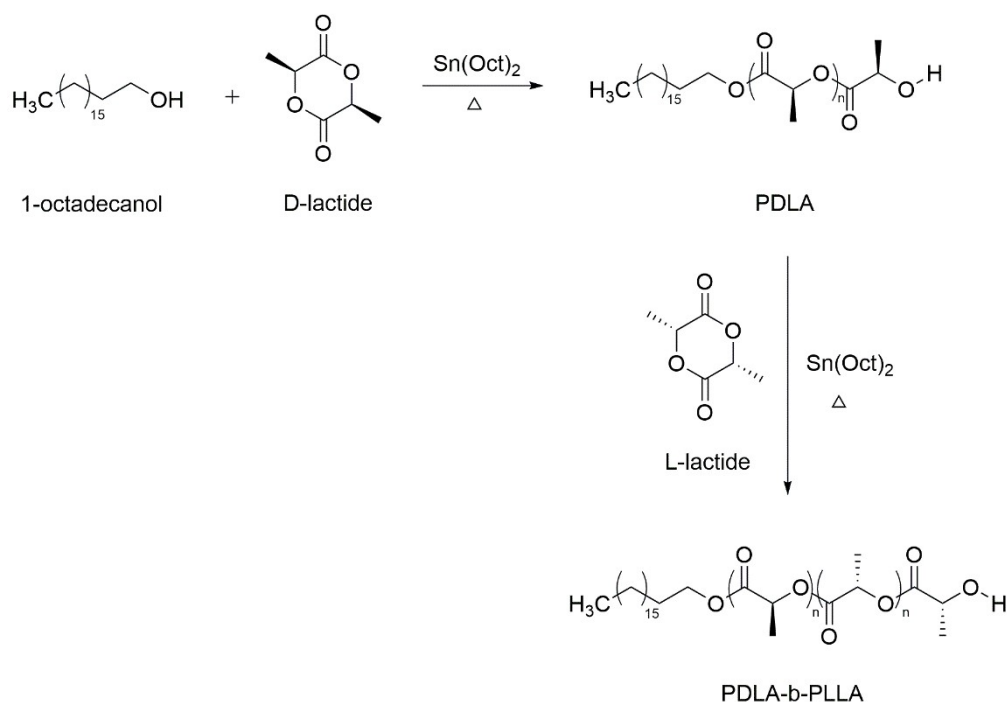

**Scheme S1:** Synthesis of stereo-diblock copolymer by two step ROP.

### SI-1. Synthesis of stereo-diblock copolymer:

Stereo-diblock copolymer was synthesized by two step ROP as shown in **Scheme S1**. In the first step, mono-hydroxyl terminated PDLA was synthesized by ROP of D-lactide in presence of 1-octadecanol as an initiator and tin octoate catalyst. Briefly, for the case of 10D, the initiator ( $0.95 \times 10^{-3}$  mmol) was added to a dried schlenk polymerization tube fixed with a two-way connector and a magnetic stirring bar and evacuated for 1 h with intermittent  $\text{N}_2$  purging. This was followed by adding recrystallized D-lactide ( $6.9 \times 10^{-2}$  mmol) and evacuated for 6-8 h with intermittent  $\text{N}_2$  purging. Finally, a catalyst solution (tin octoate,  $0.27 \times 10^{-4}$  mmol) was added to the apparatus which was then sealed under  $\text{N}_2$  atmosphere. The reaction was performed at  $180^\circ\text{C}$  for 25 min, and a sample of PDLA was withdrawn for determining the conversion using  $^1\text{H-NMR}$ . As the conversion of PDLA was higher than 95%, it was subjected to the next step without further purification.

In the second step, the PDLA synthesized as above, was used as a macroinitiator for the synthesis of stereo-diblock copolymer (see **Scheme S2**). Briefly, recrystallized L-lactide (0.14 mmol) was added to the macroinitiator (PDLA,  $6.9 \times 10^{-2}$  mmol) and evacuated at room temperature for 6-8 h. After drying the monomer, the system was filled with  $\text{N}_2$  gas and immersed in an oil bath at  $190^\circ\text{C}$  to melt PDLA and L-lactide. A catalyst solution (tin octoate,

0.55 × 10<sup>-4</sup> mmol) was added using a syringe, after the complete solubilization of monomer into the melt of macroinitiator. The reaction was performed at 190°C for 25 min. A sample was withdrawn to determine the conversion of diblock copolymer by <sup>1</sup>H-NMR. The synthesized polymer was dissolved in a mixture of dichloromethane + 10% HFIP, followed by precipitating in excess methanol. The diblock copolymer precipitates were filtered and dried in a vacuum oven at 80 °C for 12-16 h. The sample obtained was designated as ‘BCP’ for further investigations.

## SI-2. Fabrication of blends

PLLA was blended with ‘DBC’ in different ratios to form different blend samples which were regarded as ‘PLLA/DBC (20/80)’, ‘PLLA/DBC (50/50)’ and ‘PLLA/DBC (80/20)’.

**Table S1:** Sample characterization

| Sample code              | M <sub>n,th</sub> (kDa) | M <sub>n,NMR</sub> (kDa) | M <sub>n,SEC</sub> (kDa) | M <sub>w,SEC</sub> (kDa) | PDI  |
|--------------------------|-------------------------|--------------------------|--------------------------|--------------------------|------|
| <b>Homopolymers</b>      |                         |                          |                          |                          |      |
| Low MW PLLA              |                         | 25.4                     | 33.6                     | 59.6                     | 1.77 |
| High MW PLLA             | -                       | 98.5                     | 98.5                     | 163.7                    | 1.66 |
| High MW PDLA             | -                       | 177.5                    | 73.1                     | 138.2                    | 1.89 |
| <b>Diblock copolymer</b> |                         |                          |                          |                          |      |
| 10D (prepolymer)         | 10.2                    | 10.4                     | 14.9                     | 30.0                     | 2.0  |
| 10D-20L (BCP)            | 30.7                    | 31.8                     | 45.8                     | 83.1                     | 1.8  |

Note, MW =Molecular Weight

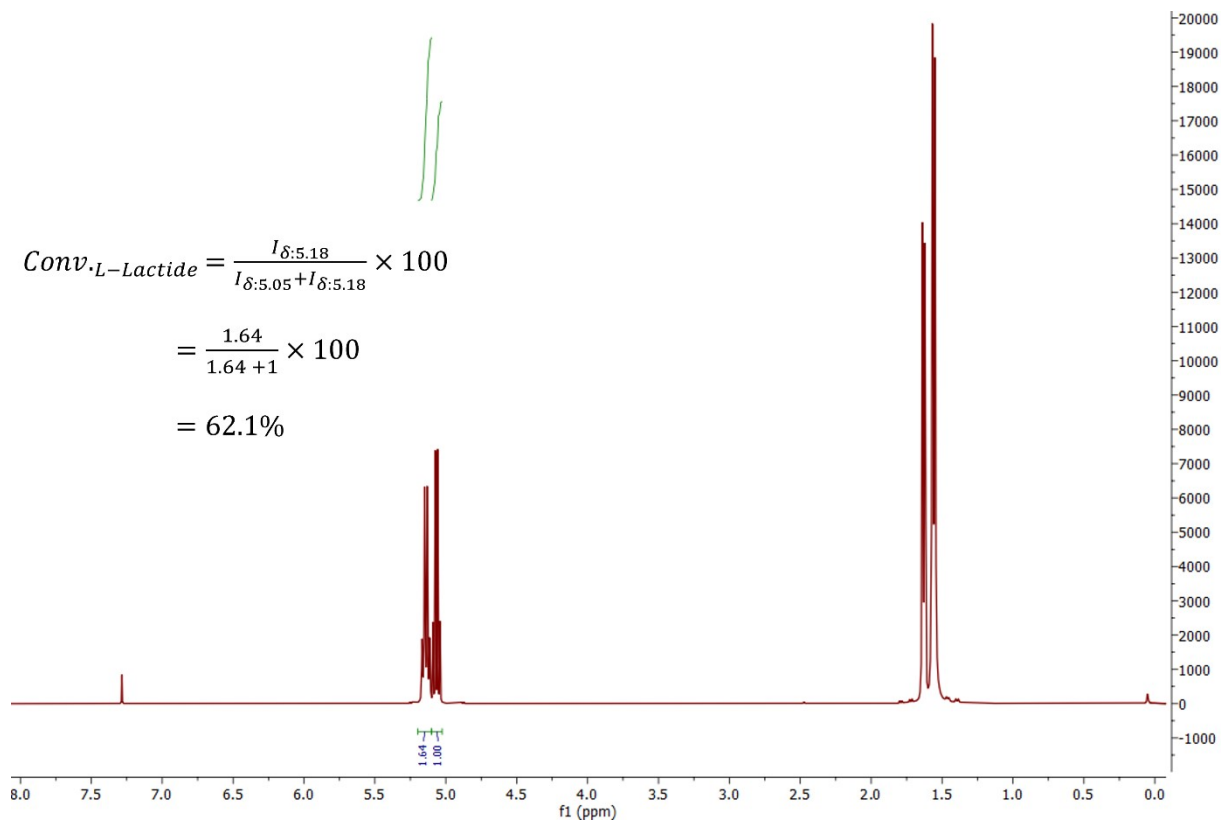

**Figure S2:**  $^1\text{H-NMR}$  spectra of the synthesized high MW PLLA (before purification).

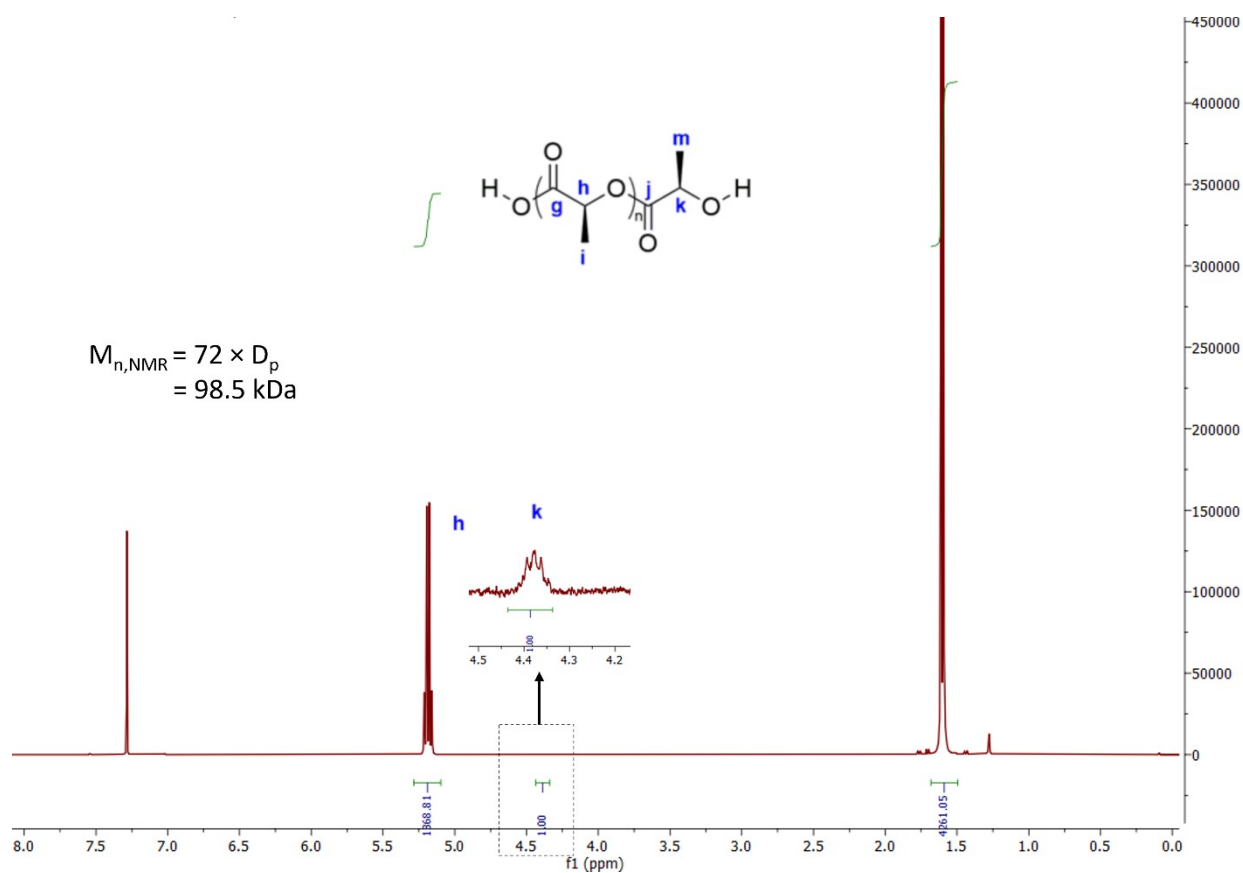

**Figure S3:**  $^1\text{H-NMR}$  spectra of the synthesized high MW PLLA (after purification).

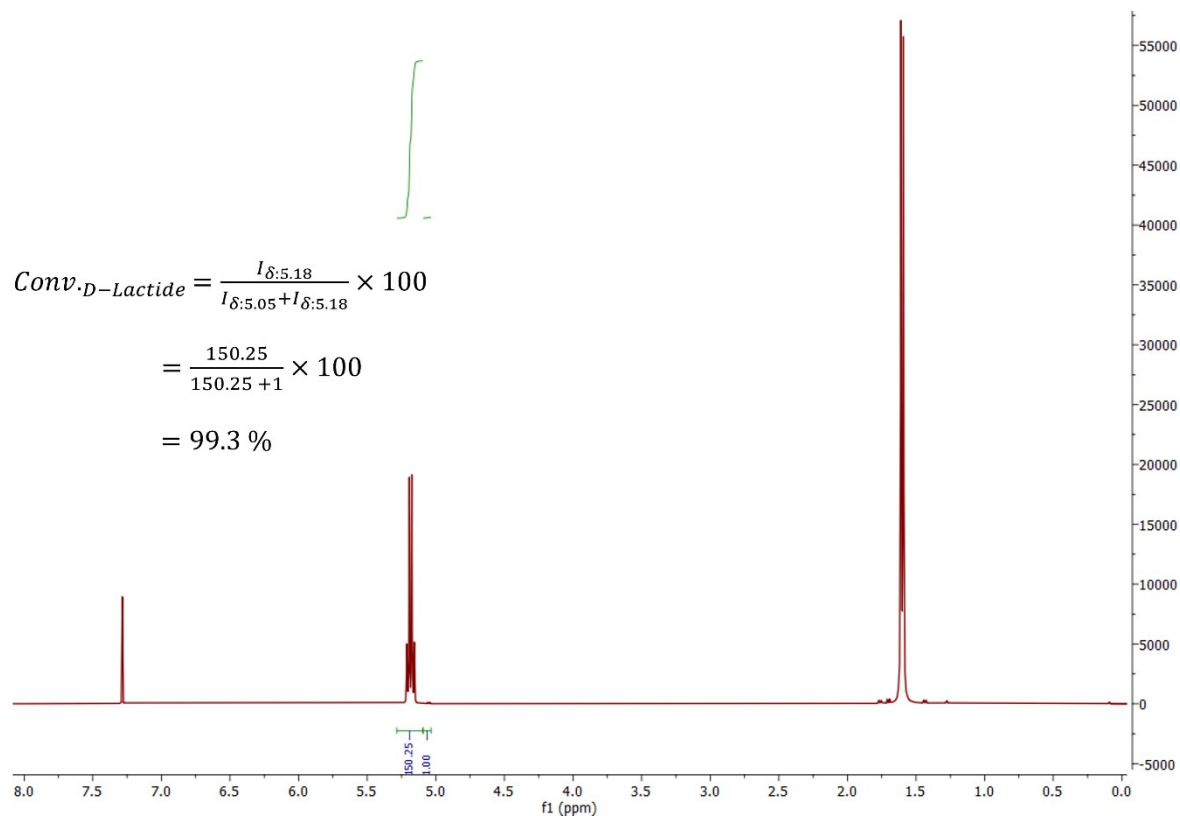

**Figure S4:**  $^1\text{H}$ -NMR spectra of the synthesized high MW PDLA (before purification).

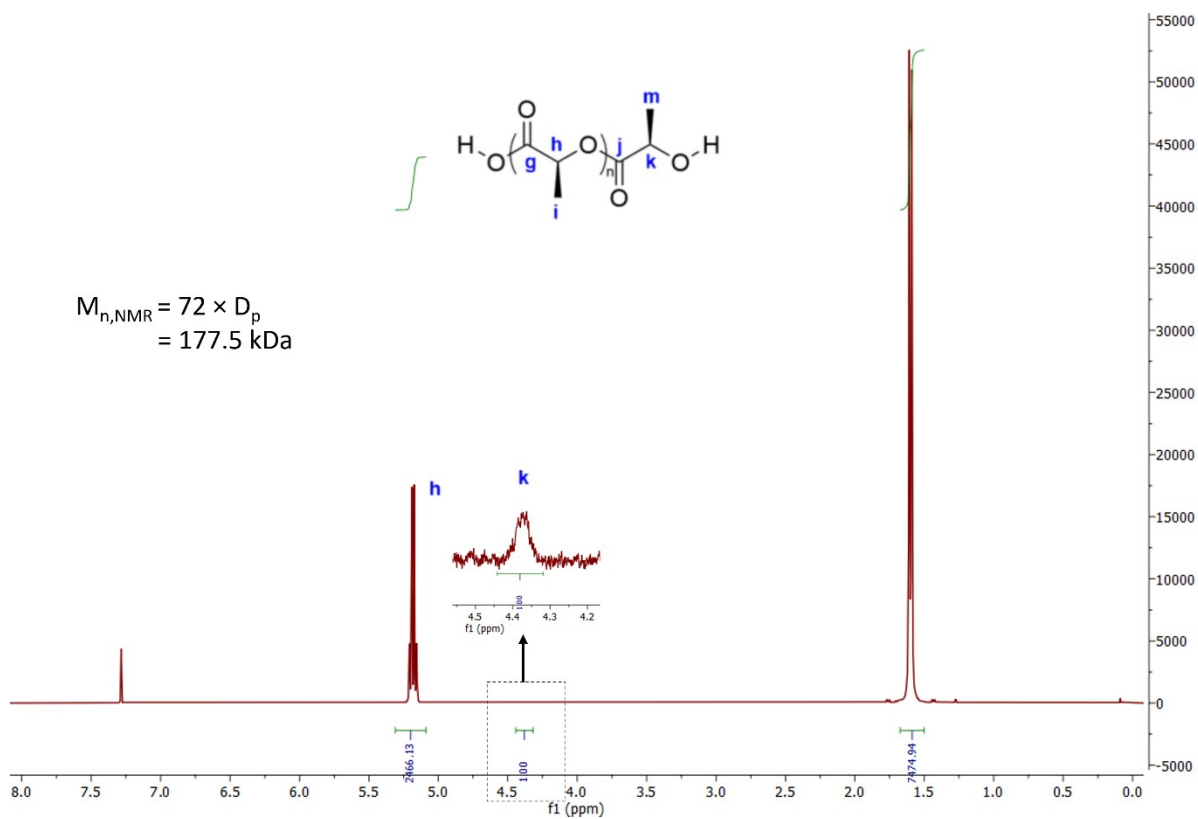

**Figure S5:**  $^1\text{H}$ -NMR spectra of the synthesized high MW PDLA (after purification).

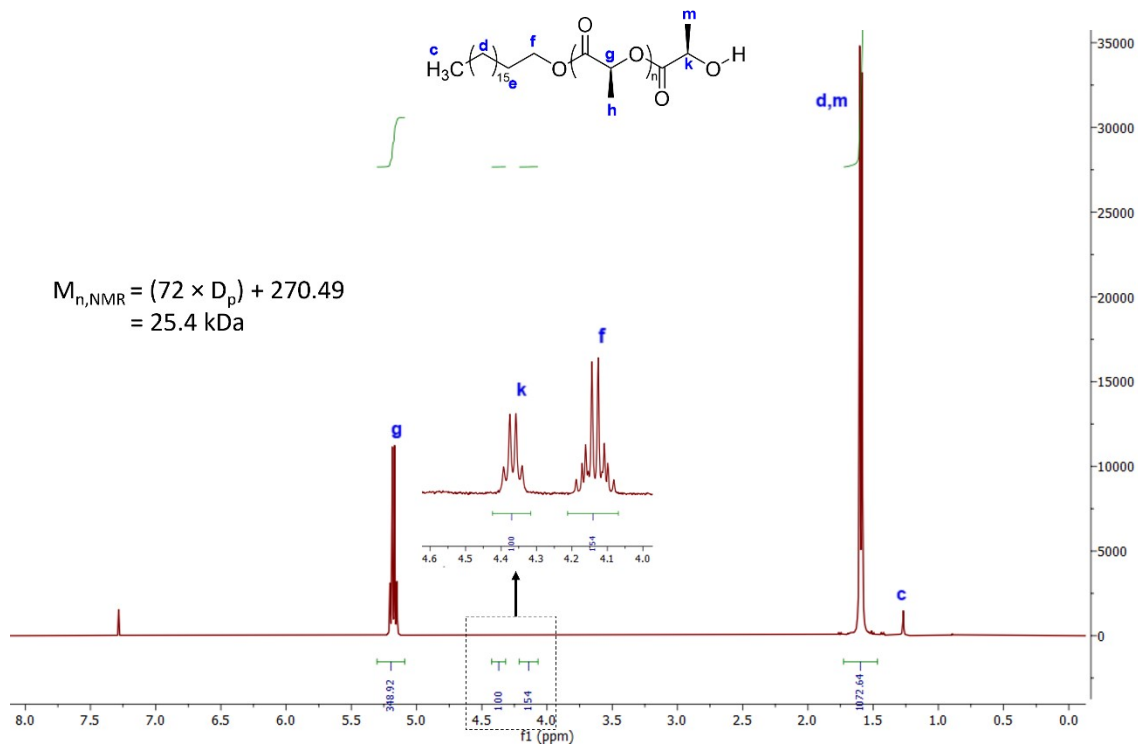

**Figure S6:**  $^1\text{H-NMR}$  spectra of the synthesized short chain PLLA (after purification).

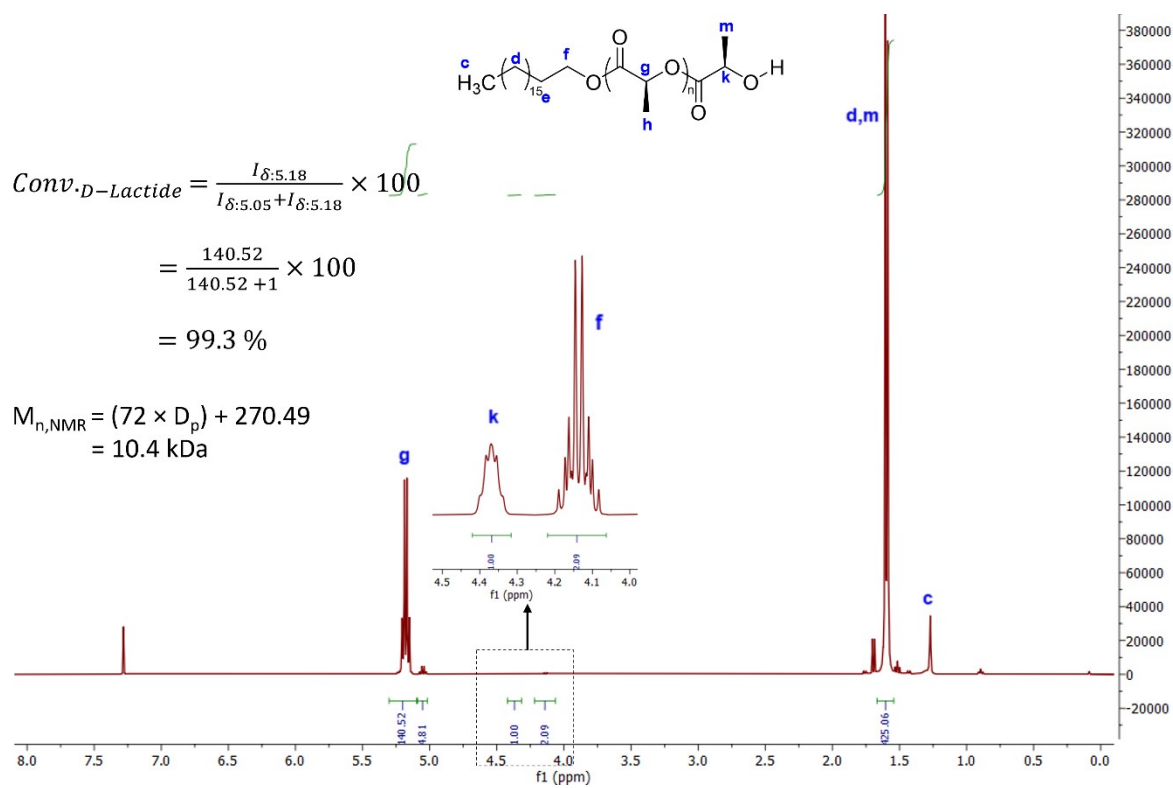

**Figure S7:**  $^1\text{H-NMR}$  spectra of the synthesized PDLA (prepolymer).



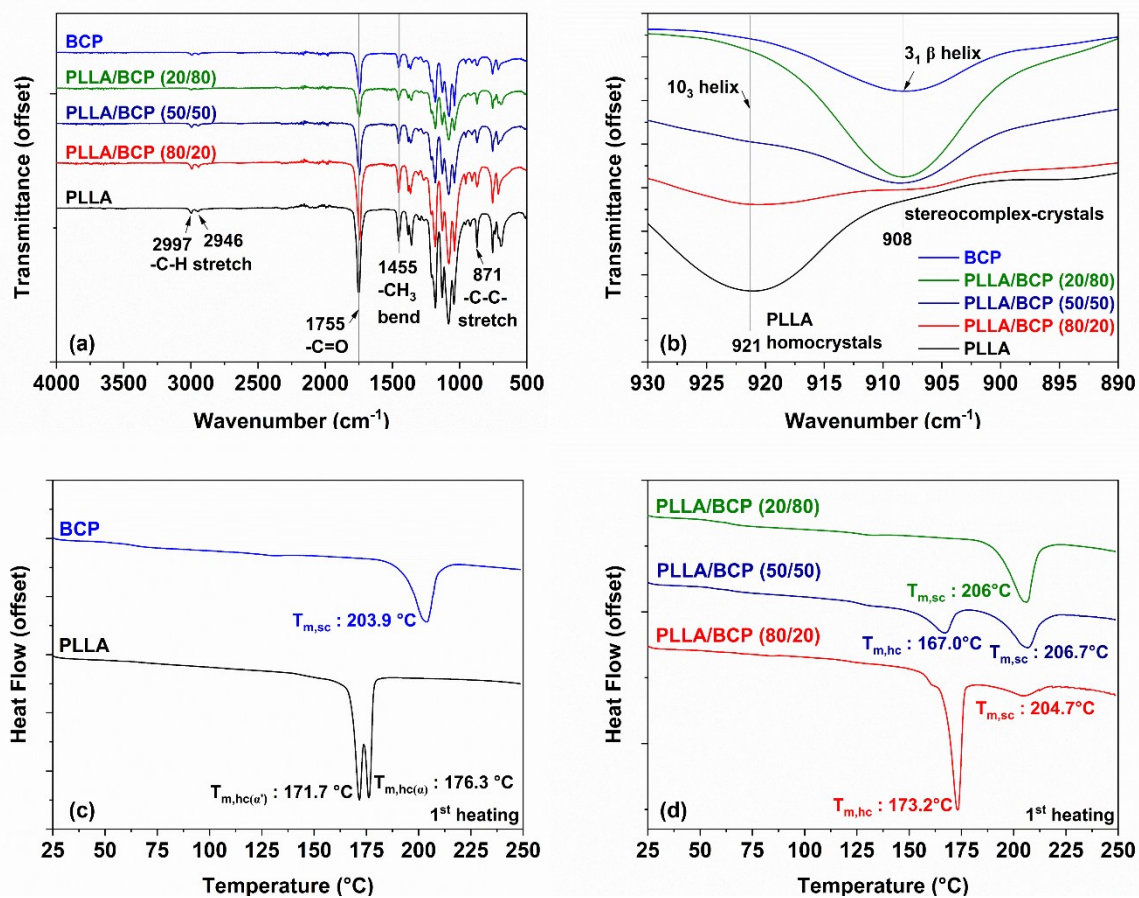

**Figure S10:** (a) Complete FTIR spectra and (b) magnified FTIR spectra (930 – 890 cm<sup>-1</sup>) of pure PLLA, BCP, PLLA/BCP (80/20), PLLA/BCP (50/50) and PLLA/BCP (20/80); (c) DSC thermograms of pure PLLA and BCP; (d) DSC thermograms of PLLA/BCP (80/20), PLLA/BCP (50/50) and PLLA/BCP (20/80).

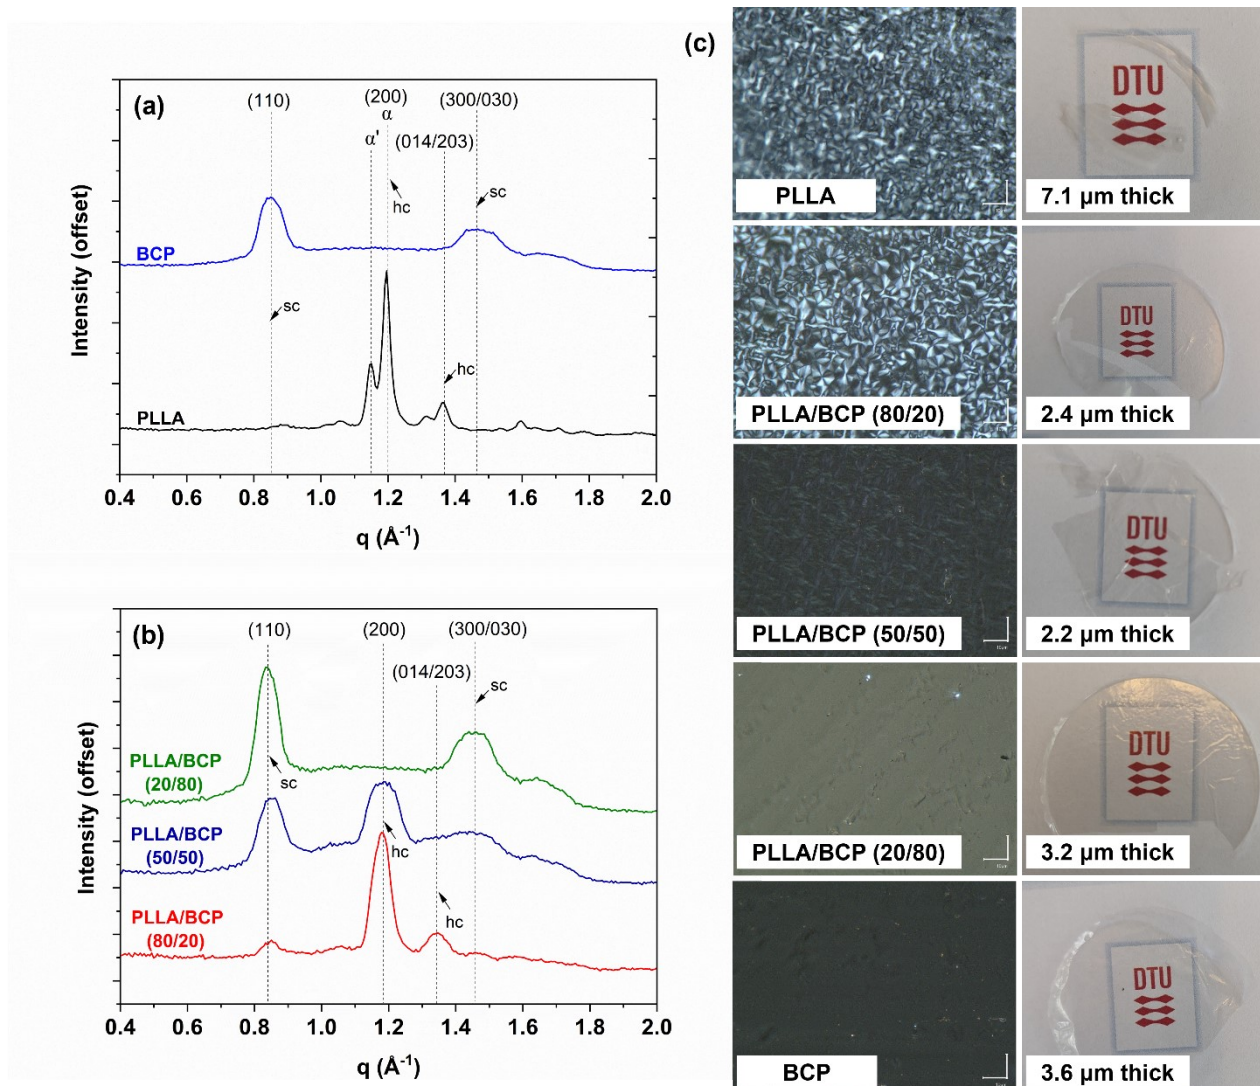

**Figure S11:** X-ray diffractograms of (a) pure PLLA and BCP, (b) PLLA/BCP (80/20), PLLA/BCP (50/50) and PLLA/BCP (20/80). (c) polarized optical micrographs of PLLA, BCP, PLLA/BCP (80/20), PLLA/BCP (50/50) and PLLA/BCP (20/80) along with their films.

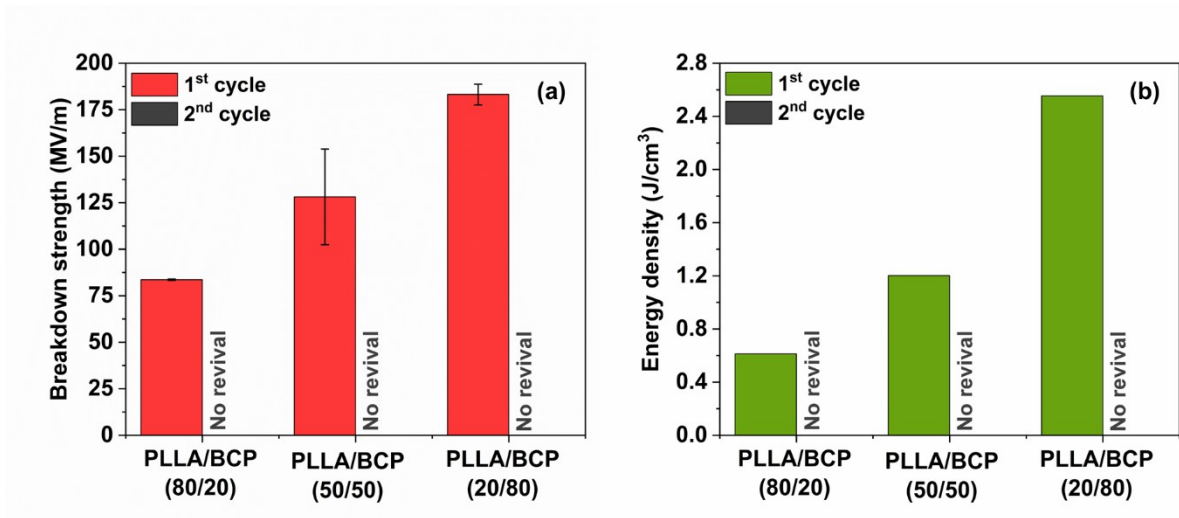

**Figure S12:** (a) Breakdown strength, and (c) energy density for PLLA/BCP (80/20), PLLA/BCP (50/50) and PLLA/BCP (20/80) after the first and second breakdown cycle.
